# Supplementary material for: Silicon Supply Improves Nodulation and Dinitrogen Fixation and Promotes Growth in Trifolium incarnatum Subjected to a Long-Term Sulfur Deprivation
Source: MDPI journal article supplement (doi:10.3390/plants12122248), 2023-06-08
Supplement: s1 [file s1]

## Supplementary Materials:

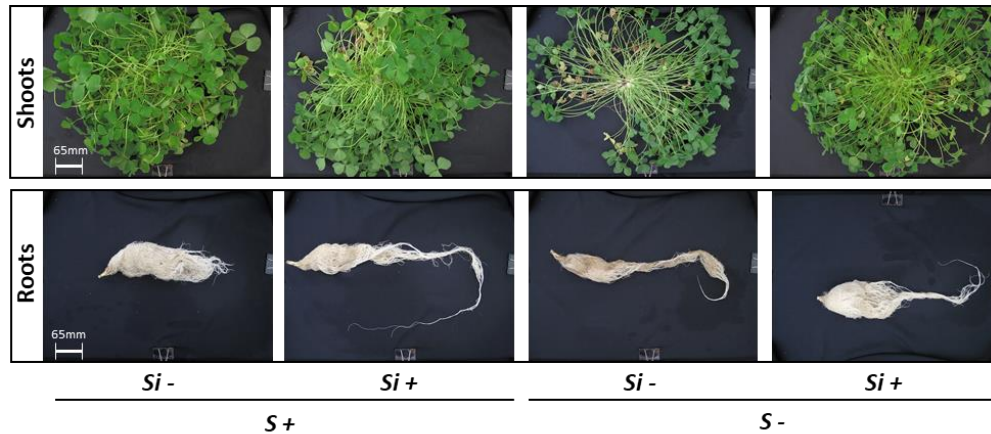

**Figure S1.** Representative pictures of roots and shoots of *Trifolium incarnatum* plants cultivated in hydroponic conditions at 63 days (D63) with (+S; 500  $\mu$ M) or without (-S) sulphur and with (+Si; 1.7 mM) or without (-Si) Si supply.

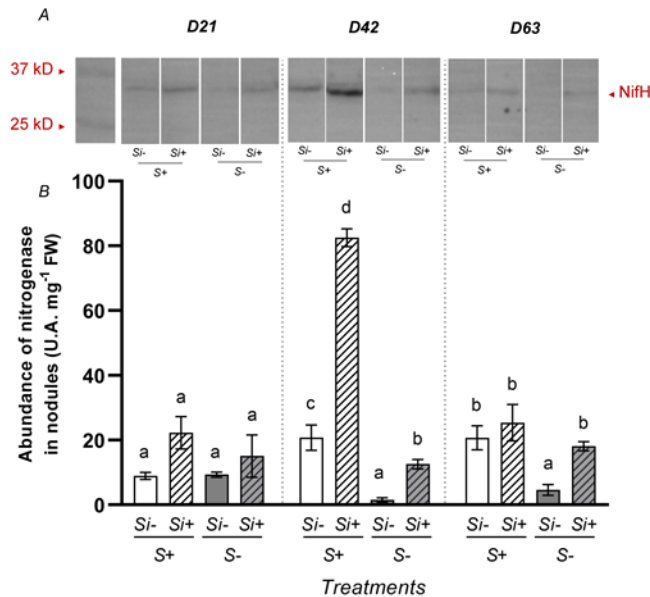

**Figure S2:** Change in nitrogenase abundance in nodules of *Trifolium incarnatum* plants cultivated in hydroponic conditions during 21 (D21), 42 (D42) and 63 days (D63) with (+S; 500  $\mu$ M) or without (-S) sulphur and with (+Si; 1.7 mM) or without (-Si) Si supply. Representative western blot performed with specific antibody of nitrogenase (NifH) (A). At each harvest date and for each treatment, the quantification of nitrogenase abundance was expressed to the fresh weight of the nodules (B). Data are means  $\pm$  SE (n=3). Different Latin letters indicate that the mean of comparison of nitrogenase relative amount between plants harvested at the same time (D21, D42, D63) are significantly different ( $p < 0.05$ ).
